# Supplementary material for: MiR-455-3p inhibits the degenerate process of chondrogenic differentiation through modification of DNA methylation
Source: PubMed Central journal article supplement (PMC5945650; doi:10.1038/s41419-018-0565-2), 2018-05-10
Supplement: 41419_2018_565_MOESM1_ESM.pdf [file 41419_2018_565_MOESM1_ESM.pdf]

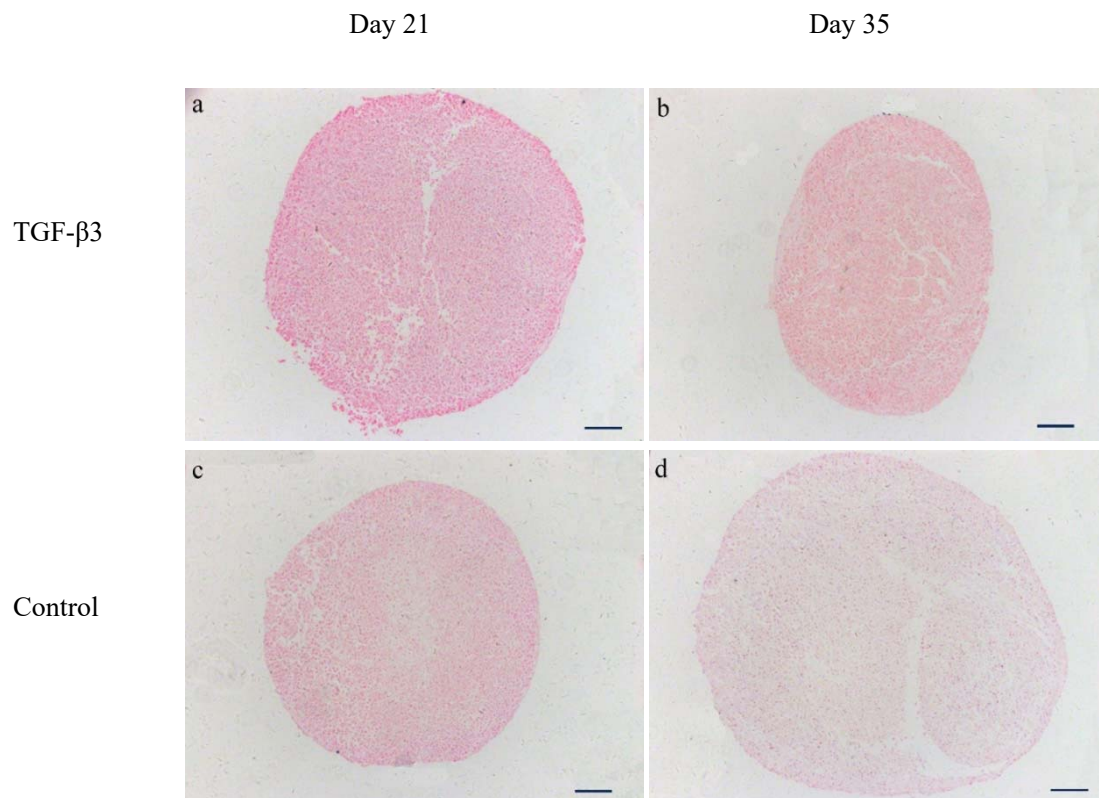

**Supplementary Figure 1.** Safranin O staining of hBMSCs chondrogenic differentiation at day 21 and 35. hBMSCs were cultured with chondrogenic induction medium (a, b) or incomplete chondrogenic induction medium without TGF- $\beta$ 3 (c, d). Safranin O staining was performed at day 21 (a, c) and 35(b, d). The experiment was performed in triplicate and a representative image is shown.
