# Supplementary material for: MiR-455-3p inhibits the degenerate process of chondrogenic differentiation through modification of DNA methylation
Source: PubMed Central journal article supplement (PMC5945650; doi:10.1038/s41419-018-0565-2), 2018-05-10
Supplement: 41419_2018_565_MOESM3_ESM.pdf [file 41419_2018_565_MOESM3_ESM.pdf]

a

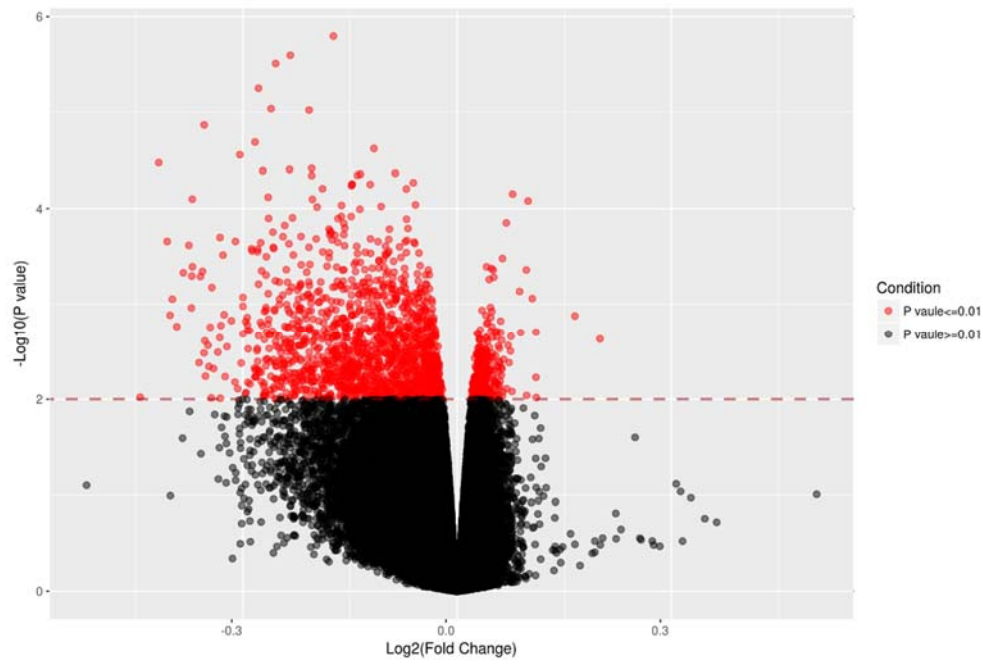

b

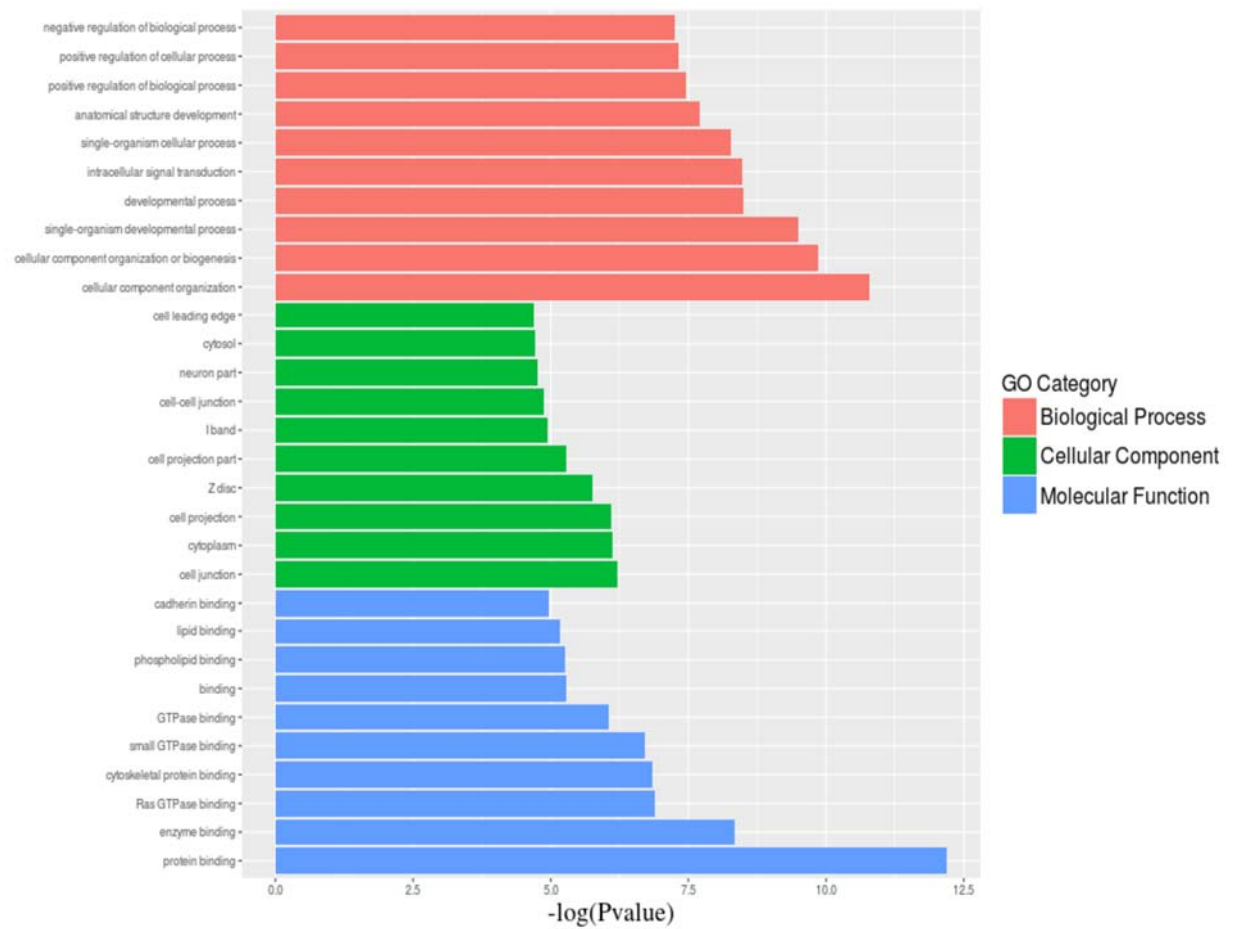

C

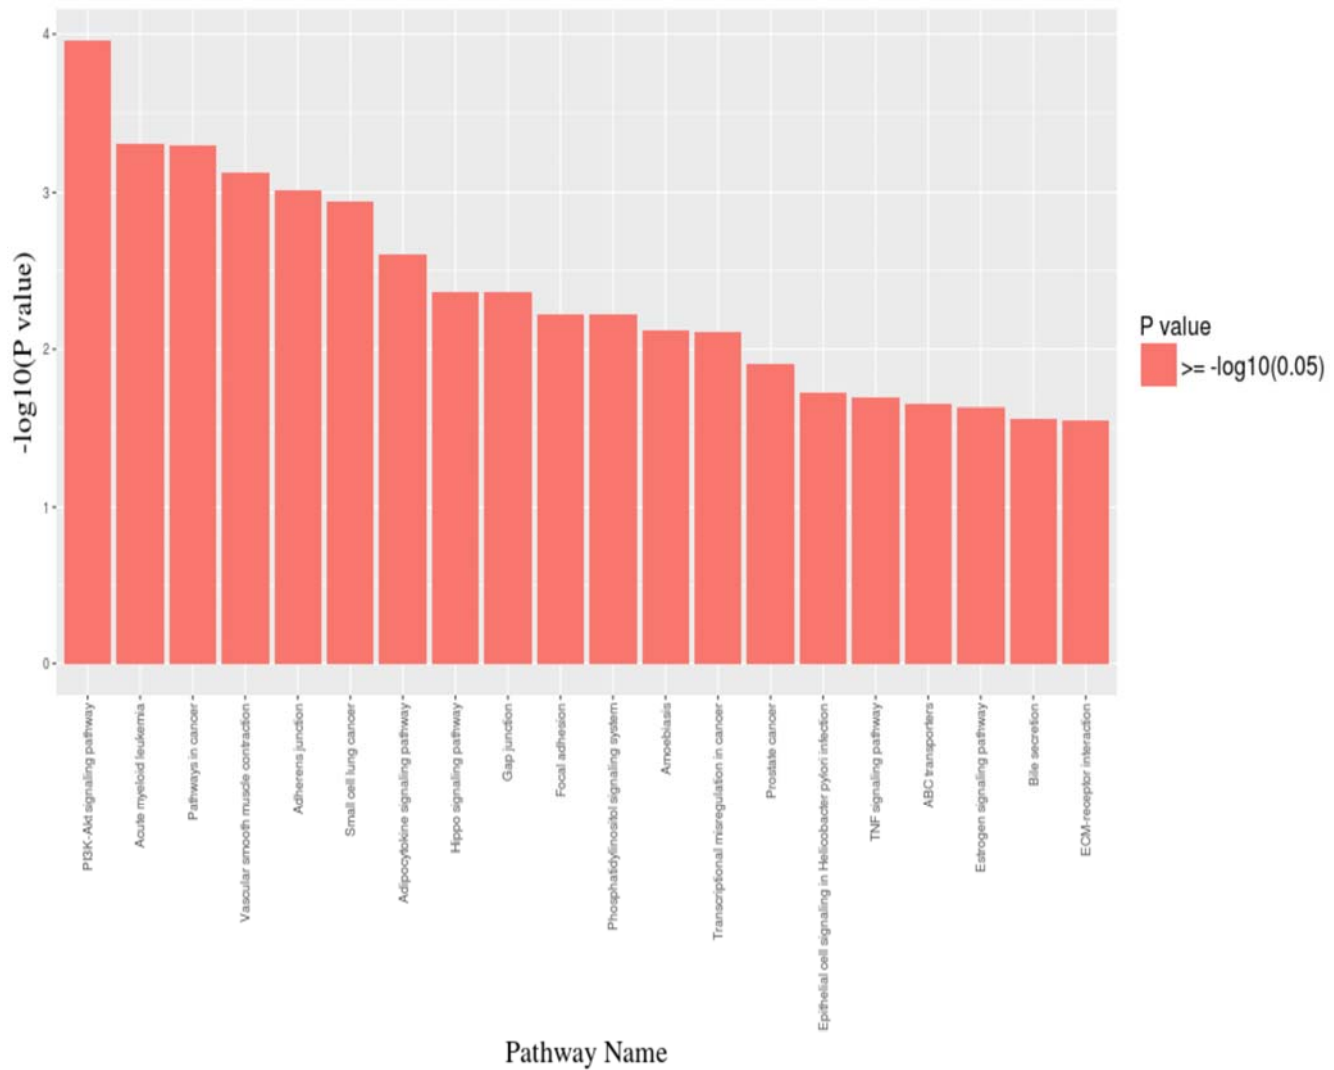

**Supplementary Figure 3.** Volcano Plot and pathway analysis of the differentially DNA methylation sites. Volcano Plot of the differentially DNA methylation sites. The dots on right side represent hypermethylation of miR-455-3p group comparing with control group, while the left side represent hypomethylation. The DNA methylation sites above the red line indicated more than 2.0 folds change(a). GO and pathway analysis of the differential DNA methylation genes (b, c).
